# Supplementary material
Source: PubMed Central journal article supplement (PMC3431570)
Supplement: supp_jc.2012-1264_12-1264_supp_data.pdf [file supp_jc.2012-1264_12-1264_supp_data.pdf]

1 **Supplemental tables**

2

3 Table 1. Phenotypic characterization of male probands and family members harboring rare  
 4 variants in *GNRHR*. \*\*\*complete loss of function; \*\*partial loss of function; \*predicted to be  
 5 pathologic; no asterisk: predicted to be benign.

| Patient (and reference)                                      | Allele 1         | Allele 2 | Diagnosis           | Testis (ml); phallus (cm) at presentation | Testosterone levels                       | Number of pulses; mean LH (Q10 min sampling x 12h for LH) at presentation | Treatments            | Fertility                    |
|--------------------------------------------------------------|------------------|----------|---------------------|-------------------------------------------|-------------------------------------------|---------------------------------------------------------------------------|-----------------------|------------------------------|
| <b>Complete Loss of GNRHR - Group 1 - cLOF/cLOF</b>          |                  |          |                     |                                           |                                           |                                                                           |                       |                              |
| 2                                                            | C279Y***         | C279Y*** | nIHH                |                                           |                                           |                                                                           |                       |                              |
| 2b                                                           | C279Y***         | C279Y*** | nIHH                |                                           |                                           |                                                                           |                       |                              |
| <b>Severe loss of GNRHR - Group 2 - cLOF/pLOF</b>            |                  |          |                     |                                           |                                           |                                                                           |                       |                              |
| 5                                                            | R139H***         | T32I**   | nIHH                | 2 ml; micropenis                          |                                           | 0; <1.6                                                                   |                       |                              |
| <b>Severe loss of GNRHR - Group 3 - pLOF/pLOF</b>            |                  |          |                     |                                           |                                           |                                                                           |                       |                              |
| 10                                                           | Q106R**, S217R** | Q106R**  | nIHH/Fertile eunuch | 12 ml                                     |                                           |                                                                           |                       |                              |
| 7                                                            | Q106R**          | P96S*    | Fertile eunuch      | 12 ml                                     |                                           | 2; 3.9                                                                    | T                     |                              |
| 8 (42)                                                       | Q106R**          | Q106R**  | nIHH/Reversal       | 17 ml; 7 cm                               | 71 ng/dl before treatment, then 271 ng/dl | 1; 3.5                                                                    | hCG                   | Yes, after 4 months of hCG.  |
| 12                                                           | R262Q**          | L166P*   | nIHH/Fertile eunuch | 15 ml                                     | 58 ng/dl                                  |                                                                           |                       |                              |
| 12b                                                          | R262Q**          | L166P*   | nIHH                |                                           |                                           |                                                                           |                       |                              |
| <b>Moderate loss of GNRHR - Group 4 - cLOF/NL or pLOF/NL</b> |                  |          |                     |                                           |                                           |                                                                           |                       |                              |
| 29                                                           | A171T***         | NL       | KS                  | 3 ml; micropenis                          |                                           |                                                                           | T                     |                              |
| 10b                                                          | Q106R**, S217R** | NL       | CDP                 |                                           |                                           |                                                                           |                       |                              |
| 18                                                           | Q106R**          | NL       | adult onset IHH     | 20 ml; NL                                 | 41-107 ng/dl                              | 0; 0.64                                                                   | T, GnRH, hCG          | Yes (1st w/pump, 2nd w/ hCG) |
| 16                                                           | Q106R**          | NL       | nIHH                | 9 ml                                      |                                           | 2; 3.86                                                                   |                       |                              |
| 19                                                           | Q106R**          | NL       | KS                  |                                           |                                           |                                                                           |                       |                              |
| 17                                                           | Q106R**          | NL       | nIHH                | 1 ml                                      |                                           |                                                                           |                       |                              |
| 15                                                           | Q106R**          | NL       | nIHH                |                                           |                                           |                                                                           |                       |                              |
| 24b                                                          | Q106R**          | NL       | nIHH                |                                           |                                           |                                                                           |                       |                              |
| 22                                                           | Q106R**          | NL       | nIHH                |                                           |                                           |                                                                           |                       |                              |
| 23                                                           | Q106R**          | NL       | nIHH                |                                           |                                           |                                                                           | T                     |                              |
| 12c                                                          | L166P*           | NL       | CDP                 |                                           |                                           |                                                                           |                       |                              |
| 30                                                           | R262Q**          | NL       | nIHH                | 1 ml; NL                                  | 25 ng/dl                                  | 1.5; 1.9                                                                  | T, GnRH, Gonadotropin |                              |

|                                                |         |    |      |                               |           |  |        |  |
|------------------------------------------------|---------|----|------|-------------------------------|-----------|--|--------|--|
| 21                                             | R262Q** | NL | KS   |                               |           |  |        |  |
| 26                                             | L117P*  | NL | CDP  | 13 ml, 8-9 cm                 | 363 ng/dl |  | No     |  |
| 28                                             | P146S*  | NL | KS   | 1 ml (cryptorchid);<br>5-6 cm |           |  | T, hCG |  |
| Normal GNRHR (not included in the four groups) |         |    |      |                               |           |  |        |  |
| 34                                             | F216F   | NL | nIHH |                               |           |  |        |  |
| 35                                             | F216F   | NL | nIHH |                               |           |  |        |  |

6

7 Table 2. Phenotypic characterization of female probands and family members harboring rare  
 8 variants in *GNRHR*. \*\*\*complete loss of function; \*\*partial loss of function; \*predicted to be  
 9 pathologic; no asterisk: predicted to be benign.

| Patient (and reference)                                      | Allele 1         | Allele 2       | Diagnosis | Spontaneous breasts; menarche       | Number of pulses; mean LH (Q10 min sampling x 12h for LH) | Treatment              | Ovulation / conception                                                                      |
|--------------------------------------------------------------|------------------|----------------|-----------|-------------------------------------|-----------------------------------------------------------|------------------------|---------------------------------------------------------------------------------------------|
| <b>Complete Loss of GNRHR - Group 1 - cLOF/cLOF</b>          |                  |                |           |                                     |                                                           |                        |                                                                                             |
| 1                                                            | Q11fsX23***      | Q11fsX23***    | nIHH      |                                     |                                                           |                        | No ovulation w/ either GnRH or gnts                                                         |
| 2c                                                           | C279Y***         | C279Y***       | nIHH      |                                     |                                                           |                        |                                                                                             |
| <b>Severe loss of GNRHR - Group 2 - cLOF/pLOF</b>            |                  |                |           |                                     |                                                           |                        |                                                                                             |
| 3                                                            | M1T***, R139H*** | Q106R**        | nIHH      | Tanner I; no menarche               | 0; 1.02                                                   | EP, GnRH pump          | Ovulated on GnRH; conceived w/ gnts: healthy baby                                           |
| 4 (35)                                                       | P320L***         | N10K**, Q11K** | nIHH      | Tanner III; no menarche             | 1; 1.78                                                   | EP, GnRH, Gonadotropin | No ovulation on GnRH; twins with gnts                                                       |
| 6                                                            | L266R***         | Q106R**        | nIHH      | Spontaneous breasts (?); nomenarche |                                                           |                        |                                                                                             |
| <b>Severe loss of GNRHR - Group 3 - pLOF/pLOF</b>            |                  |                |           |                                     |                                                           |                        |                                                                                             |
| 10c                                                          | Q106R**, S217R** | Q106R**        | nIHH      |                                     |                                                           |                        |                                                                                             |
| 11 (41)                                                      | Q106R**          | R262Q**        | nIHH      | No breasts; no menarche             | 5; 2.03                                                   | EP, GnRH, Gonadotropin | Conceived 3 times with GnRH and 2 times with gnts; miscarriages at 7-11 weeks of gestation. |
| 11b (41)                                                     | Q106R**          | R262Q**        | nIHH      |                                     |                                                           |                        | Conceived with gntns: healthy babies                                                        |
| 9                                                            | Q106R**          | Q106R**        | KS        | Tanner IV; no menarche              |                                                           | EP                     |                                                                                             |
| 13                                                           | R262Q**          | R262Q**        | nIHH      |                                     |                                                           |                        |                                                                                             |
| <b>Moderate loss of GNRHR - Group 4 - cLOF/NL or pLOF/NL</b> |                  |                |           |                                     |                                                           |                        |                                                                                             |
| 14                                                           | Q106R**          | L83V           | nIHH      | No breasts; no menarche             |                                                           | EP                     |                                                                                             |
| 14b                                                          | Q106R**          | L83V           | nIHH      |                                     |                                                           |                        |                                                                                             |
| 25                                                           | Q106R**          | S168A          | HA        | Breasts at 11-12; menarche at 16    | 5; 3.9                                                    |                        |                                                                                             |
| 20                                                           | Q106R**          | NL             | KS        |                                     |                                                           |                        |                                                                                             |
| 24                                                           | Q106R**          | NL             | nIHH      |                                     |                                                           |                        |                                                                                             |

|                                                |         |    |                  |  |        |  |                                    |
|------------------------------------------------|---------|----|------------------|--|--------|--|------------------------------------|
| 10d                                            | Q106R** | NL | HA               |  |        |  | Conceived w/o treatments           |
| 27                                             | P146S*  | NL | nIHH             |  | 5; 4.8 |  | 3 ovulations on pump, no pregnancy |
| 32                                             | R262Q** | NL | HA               |  |        |  |                                    |
| 31                                             | R262Q** | NL | KS               |  |        |  |                                    |
| 5b                                             | R139H*  | NL | Anosmia          |  |        |  |                                    |
| 21b                                            | Q106R** | NL | cleft lip/palate |  |        |  |                                    |
| Normal GNRHR (not included in the four groups) |         |    |                  |  |        |  |                                    |
| 33                                             | A50V    | NL | CDP              |  |        |  |                                    |

10

11 Table 3. Healthy family members harboring rare variants in *GN RHR*. \*\*\*complete loss of  
 12 function; \*\*partial loss of function; \*predicted to be pathologic; no asterisk: predicted to be  
 13 benign.

14

| Subject | Gended | Heterozygous mutation |
|---------|--------|-----------------------|
| 3c      | M      | M1T***, R139H***      |
| 3d      | M      | M1T***, R139H***      |
| 8c      | M      | Q106R**               |
| 8d      | M      | Q106R**               |
| 8e      | M      | Q106R**               |
| 11c     | M      | R262Q**               |
| 11f     | M      | R262Q**               |
| 11g     | M      | R262Q**               |
| 6c      | M      | Q106R**               |
| 12d     | M      | L166P*                |
| 3b      | F      | Q106R**               |
| 4b      | F      | N10K**, Q11K**        |
| 4c      | F      | P320L***              |
| 4d      | F      | N10K**, Q11K**        |
| 14c     | F      | L83V                  |
| 14d     | F      | Q106R**               |
| 8b      | F      | Q106R**               |
| 24c     | F      | Q106R**               |
| 18b     | F      | Q106R**               |
| 11d     | F      | Q106R**               |
| 11e     | F      | Q106R**               |
| 6b      | F      | L266R***              |
| 12e     | F      | R262Q**               |
| 29b     | F      | A171T***              |
| 30b     | F      | R262Q**               |
| 32b     | F      | R262Q**               |

15

16

17 Table 4. SNPs used for SNP analysis of heterozygous subjects and their location within  
18 *GNRHR* gene.  
19

| <b>SNP name</b> | <b>Location<br/>(relative to <i>GNRHR</i><br/>transcriptional start site)</b> | <b>Location<br/>(relative to<br/>coordinate systems)</b> |
|-----------------|-------------------------------------------------------------------------------|----------------------------------------------------------|
| rs2627261       | 1-62                                                                          | 68302710                                                 |
| rs35400155      | 144                                                                           | 68302505                                                 |
| rs4986942       | 453                                                                           | 68302196                                                 |
| rs17082306      | 520-75                                                                        | 68293178                                                 |
| rs13130501      | 549                                                                           | 68293074                                                 |
| rs13149772      | 550                                                                           | 68293073                                                 |
| rs17088591      | 741+35                                                                        | 68292846                                                 |
| rs28933074      | 851                                                                           | 68288929                                                 |
| rs35845954      | 987+583                                                                       | 68288888                                                 |
| rs35610027      | 987+802                                                                       | 68289107                                                 |
| rs35683646      | 987+809                                                                       | 68289114                                                 |
| rs17635850      | 987+829                                                                       | 68289134                                                 |
| rs13150734      | 987+1260                                                                      | 68288703                                                 |

20

## Supplemental figure legends

Figure 1. Schematic of mutations in *GNR HR*.

Figure 2. Examples of pedigrees carrying *GN RHR* RSVs. A: family of proband #10; B: family of proband #12.

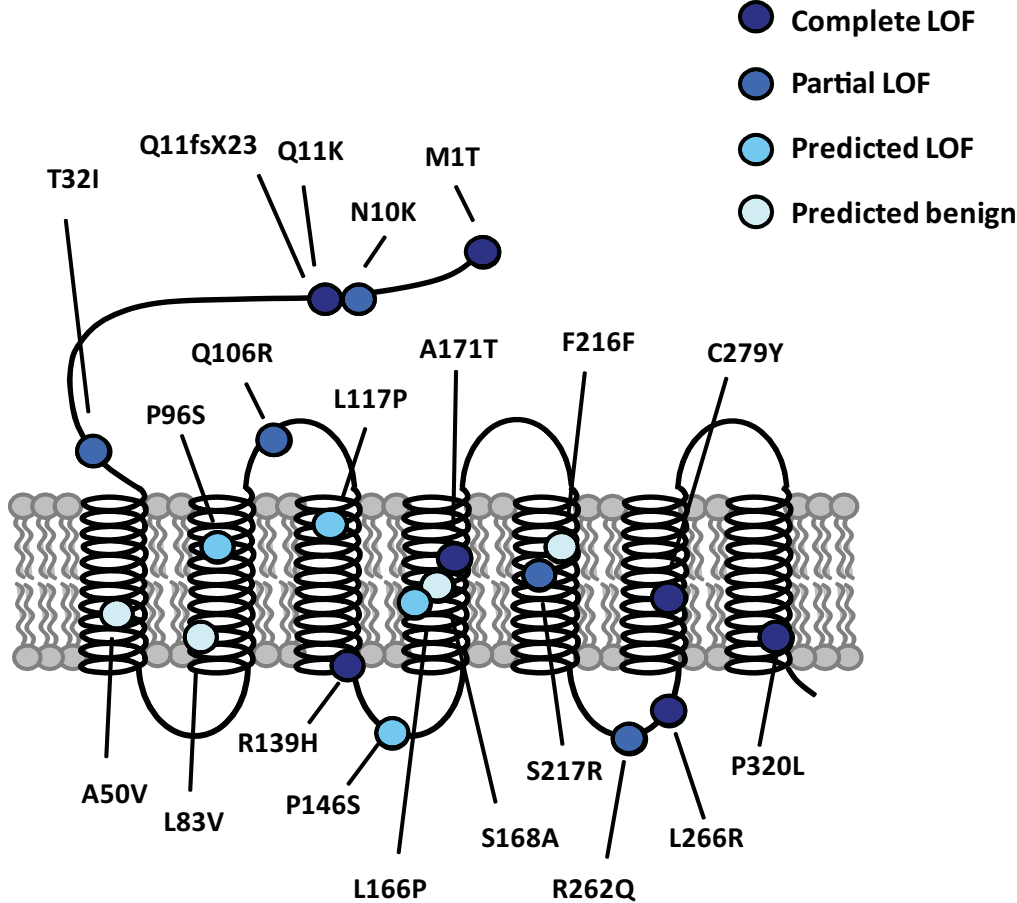

Fig. 1



-  IHH
-  Delayed Puberty (CDP)
-  Anosmia
-  Hypothalamic amenorrhea (HA)

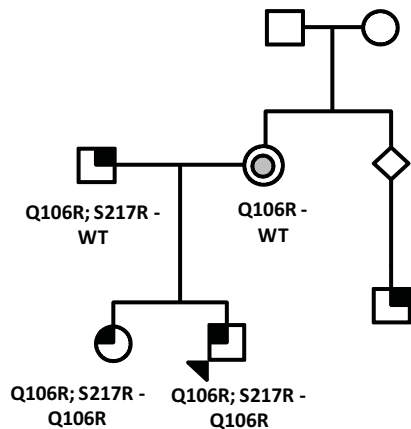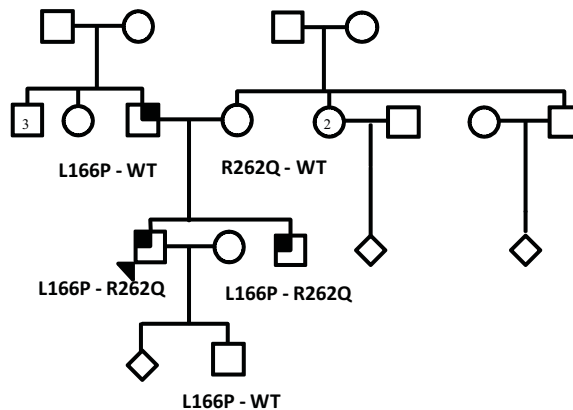

Fig. 2
